# Supplementary material for: Concurrent detection and treatment of cyanide-contaminated water using mechanosynthesized receptors
Source: Royal Society of Chemistry journal article supplement (doi:10.1039/d0an00449a), 2020-01-01
Supplement: d0an00449a1.pdf [file d0an00449a1.pdf]

## **Electronic Supplementary Information**

# **Concurrent detection and treatment of cyanide contaminated water using mechanosynthesized receptors**

**Ratish R. Nair,<sup>a,b</sup> M. Raju,<sup>a,b</sup> Snehasish Debnath,<sup>a,b</sup> Riya Ghosh,<sup>a</sup> and  
Pabitra B. Chatterjee<sup>\*a,b</sup>**

<sup>a</sup>Analytical & Environmental Science Division and Centralized Instrument Facility,

CSIR-CSMCRI, G. B. Marg, Bhavnagar, India.

<sup>b</sup> Academy of Scientific and Innovative Research (AcSIR),

Kamla Nehru Nagar, Ghaziabad-201002, India.

Corresponding author: [pbchatterjee@csmcri.res.in](mailto:pbchatterjee@csmcri.res.in)

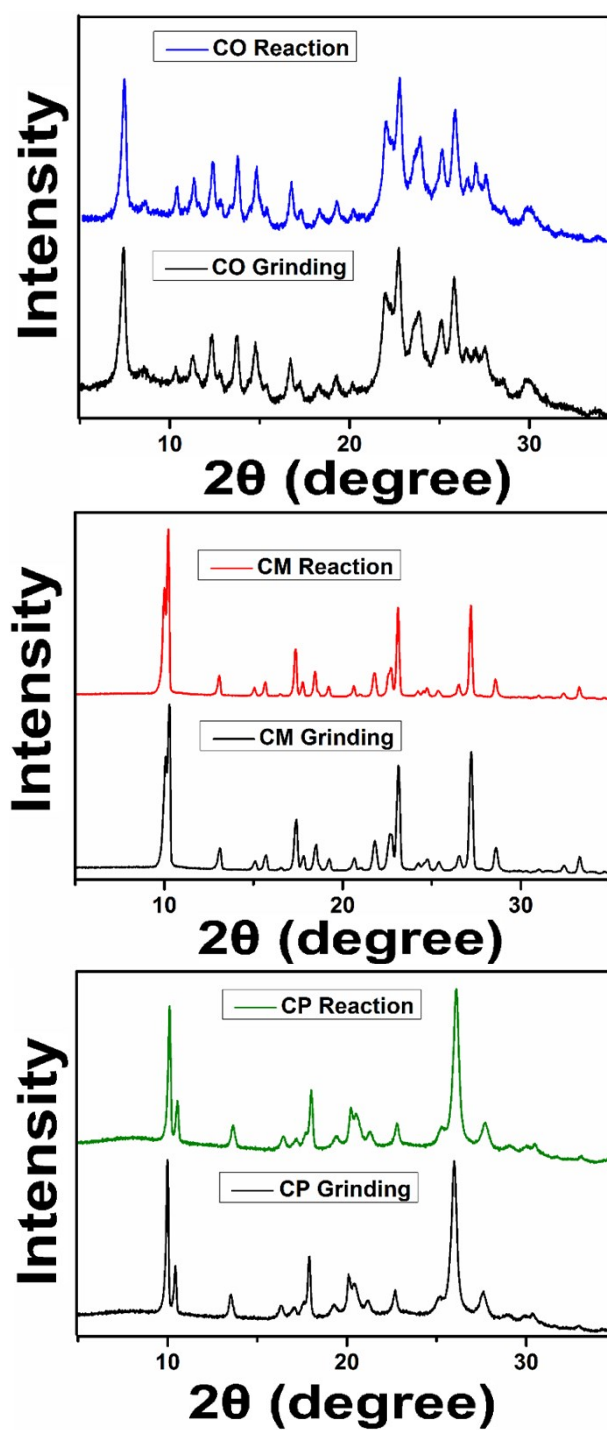

**Fig. S1.** Comparison of the PXRD patterns of CO, CM, and CP synthesised via MC and solution-based refluxing routes.

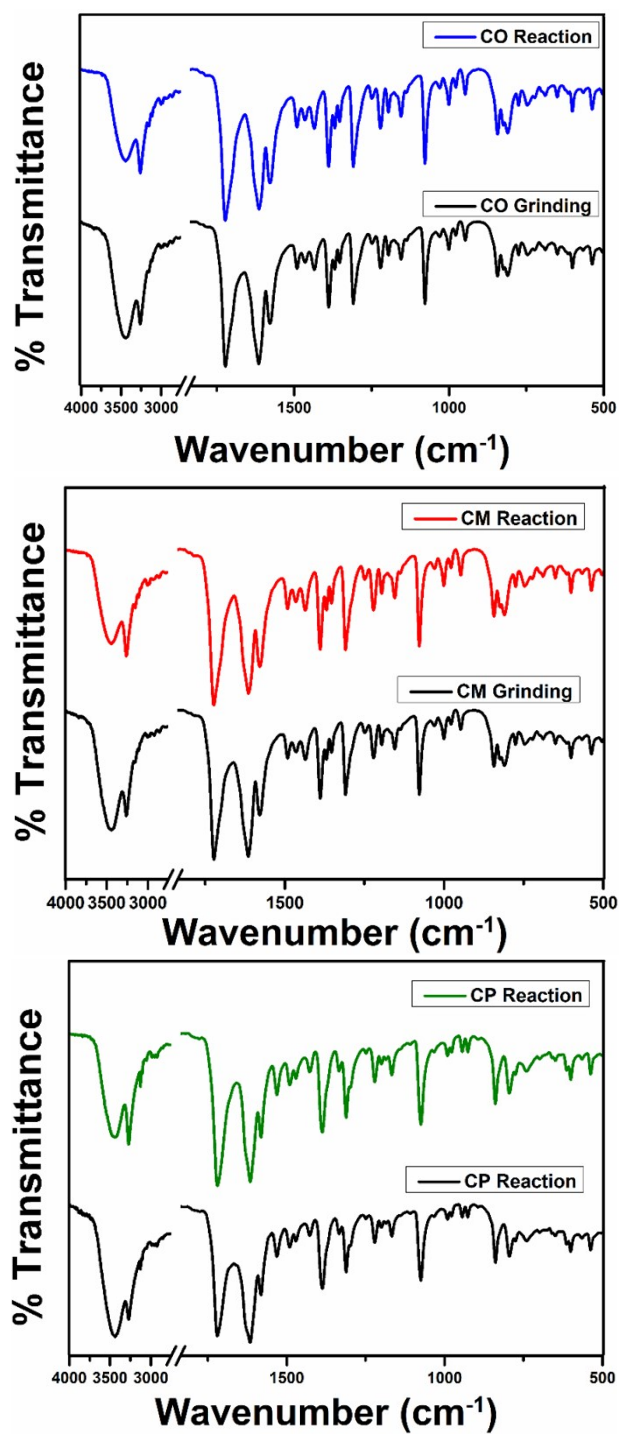

**Fig. S2.** FTIR profiles of CO, CM, and CP synthesised by two different pathways such as MC and solution-based refluxing.

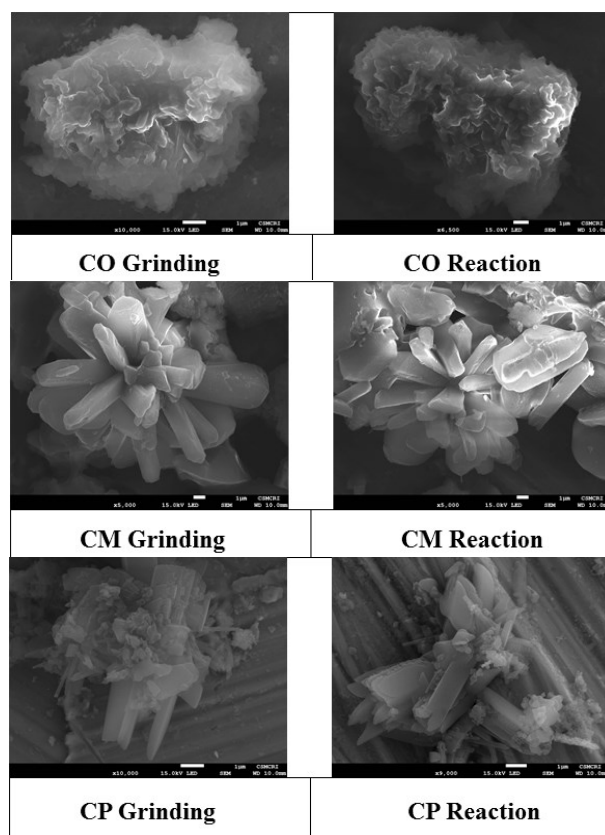

**Fig. S3.** FE-SEM images of the molecular probes CO, CM, and CP prepared via MC and solution-based refluxing methods.

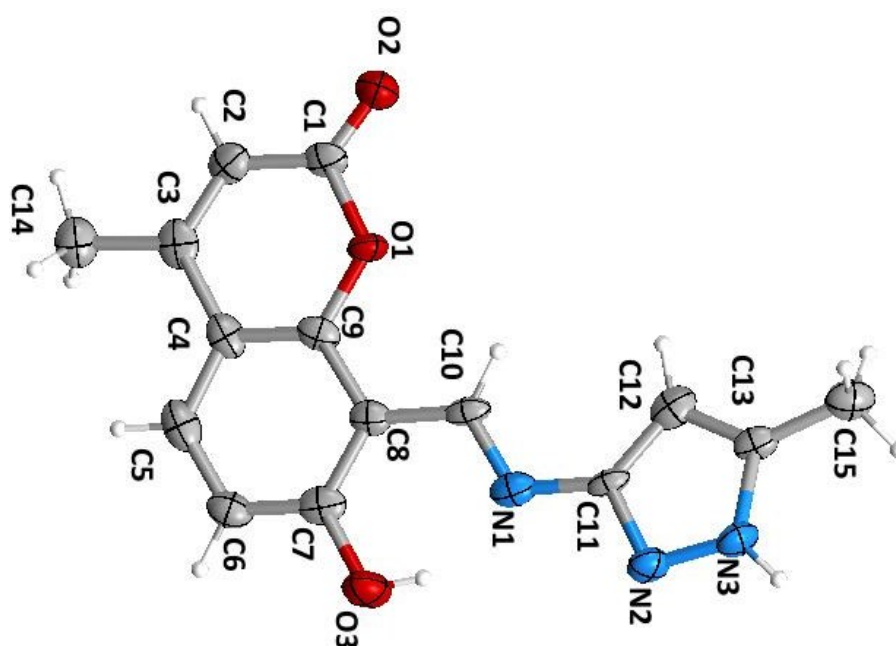

**Fig. S4.** ORTEP view and atom-numbering scheme of the molecular probe CM. The lattice methanol is omitted for clarity. The ellipsoids represent 50 % probability factor.

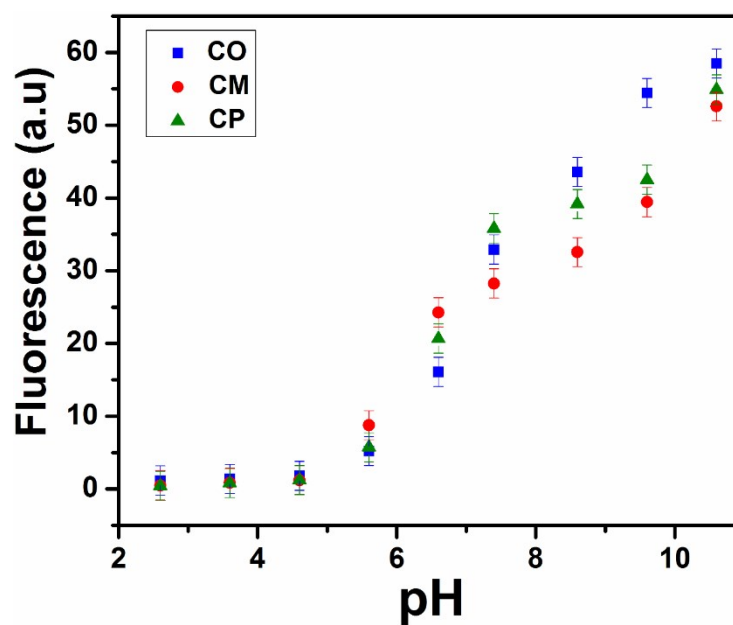

**Fig. S5.** Fluorescence based pH studies for CO, CM, and CP (20  $\mu$ M, 2.5 % DMSO in water) in aqueous solution.

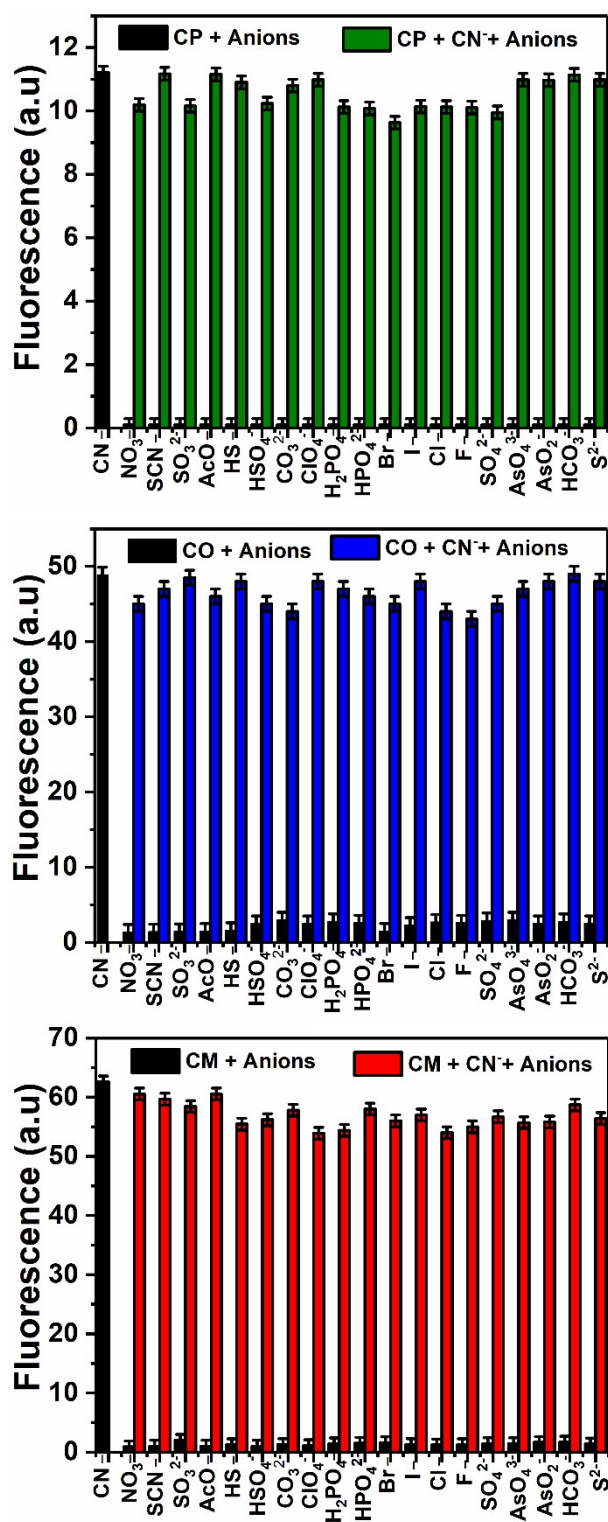

**Fig. S6.** Competitive fluorescence study of CP, CO, and CM (20  $\mu$ M in 2.5 % DMSO in water) for cyanide sensing in presence of double excess other anions in HEPES buffer (50 mM) at pH 7.4.

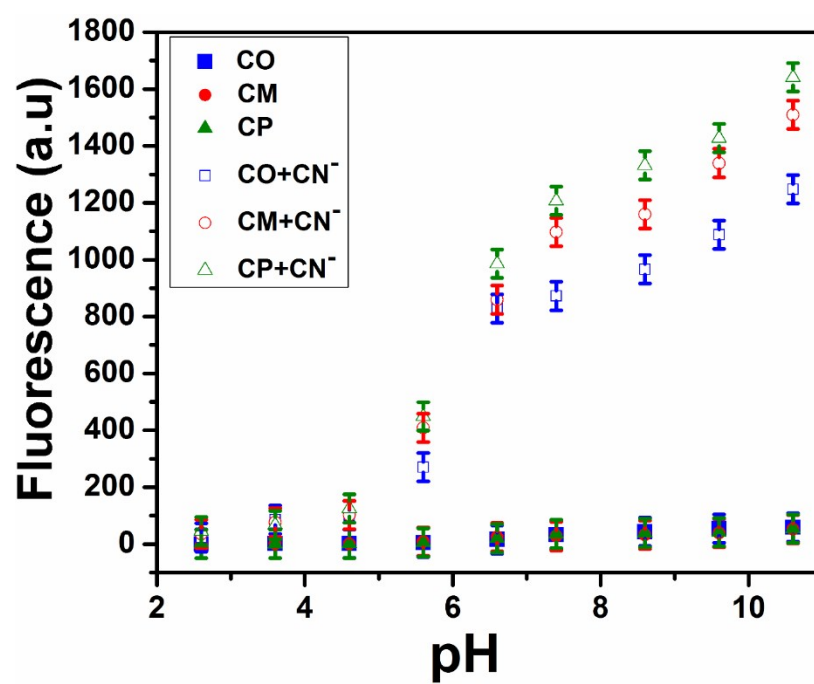

**Fig. S7.** Fluorescence based pH studies for CO, CM, and CP (20  $\mu$ M, 2.5 % DMSO in water) in presence of cyanide (2.5 mM) in aqueous solution.

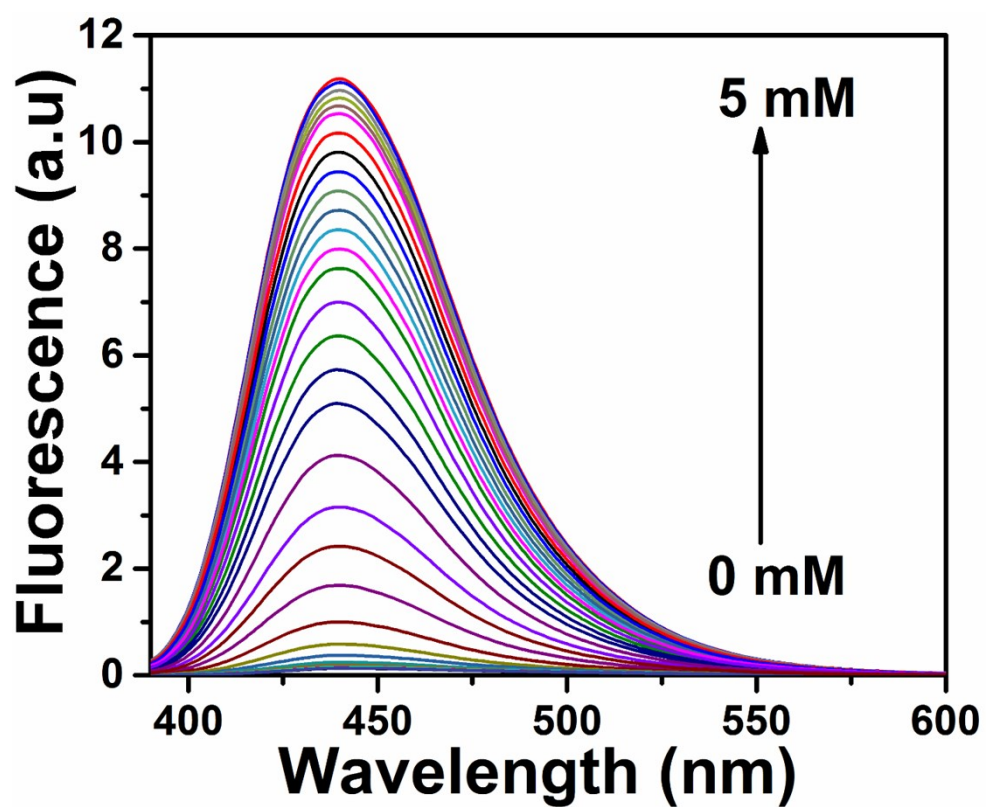

**Fig. S8.** Fluorescence titration profiles of CP (20  $\mu$ M, 2.5 % DMSO in water) upon addition of increasing concentrations of cyanide (0-5 mM) in HEPES (50 mM) buffer at physiological pH 7.4.



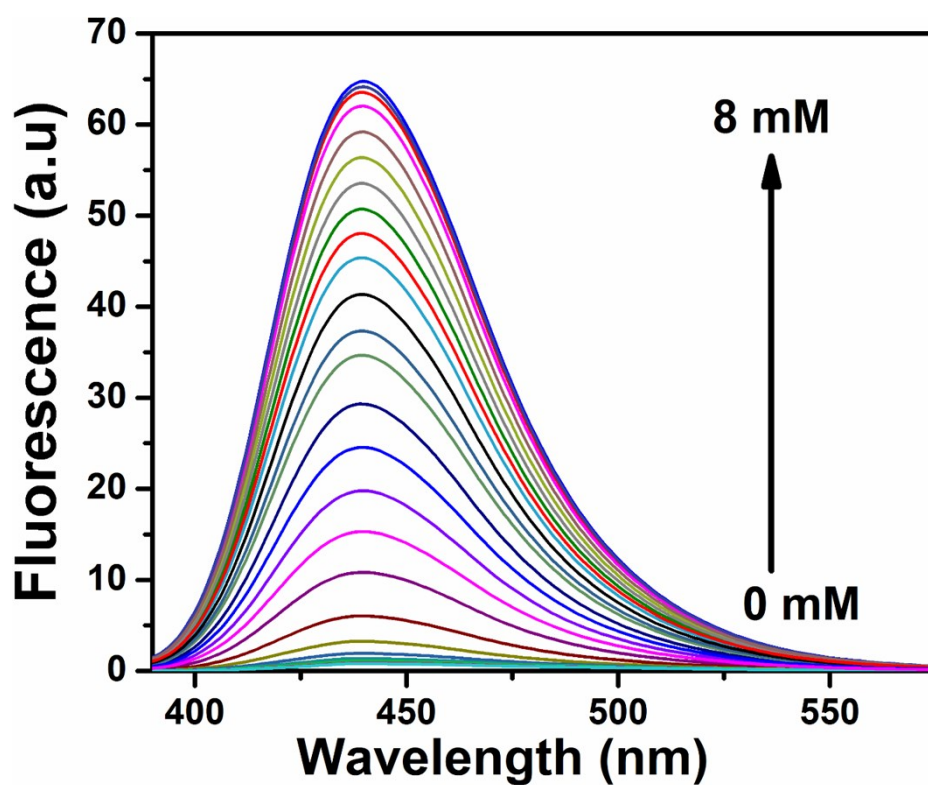

**Fig. S9.** Fluorescence titration profiles of CO (20  $\mu$ M, 2.5 % DMSO in water) upon addition of increasing concentrations of cyanide (0-8 mM) in HEPES (50 mM) buffer at physiological pH 7.4.

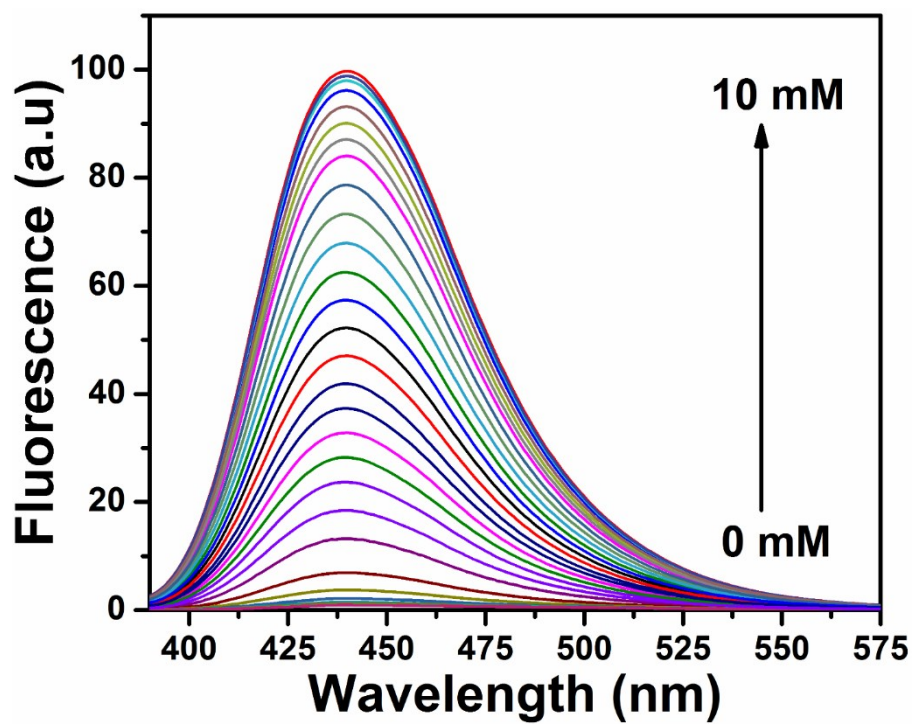

**Fig. S10.** Fluorescence titration profiles of CM (20  $\mu$ M, 2.5 % DMSO in water) upon addition of increasing concentrations of cyanide (0-10 mM) in HEPES (50 mM) buffer at physiological pH 7.4.

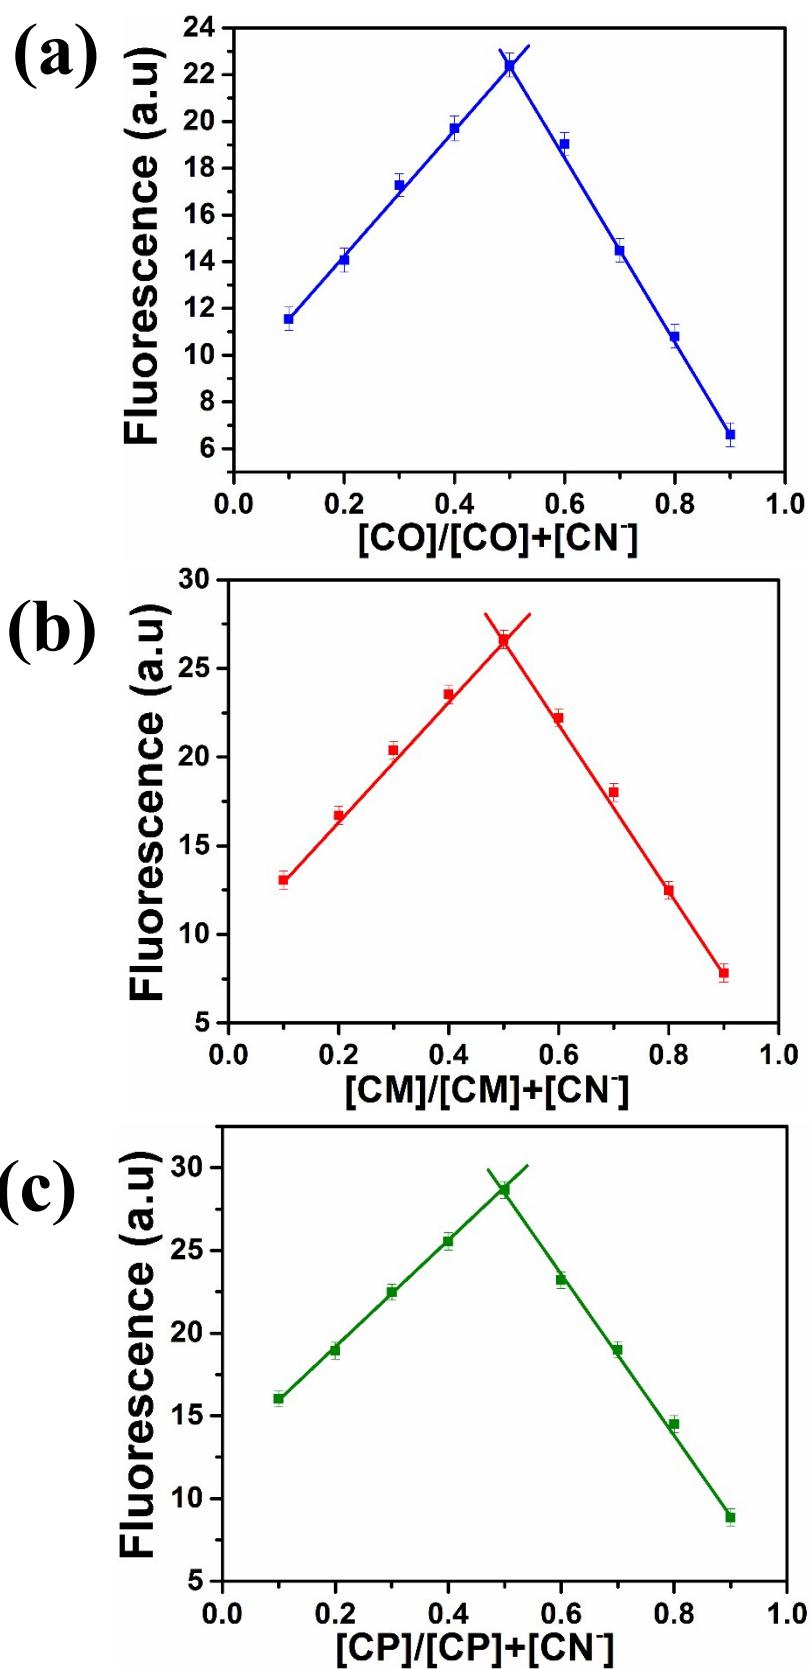

**Fig. S11.** Job's plots for (a) CO, (b) CM, and (c) CP in presence of different concentrations of cyanide in 50 mM HEPES aqueous buffer solutions.

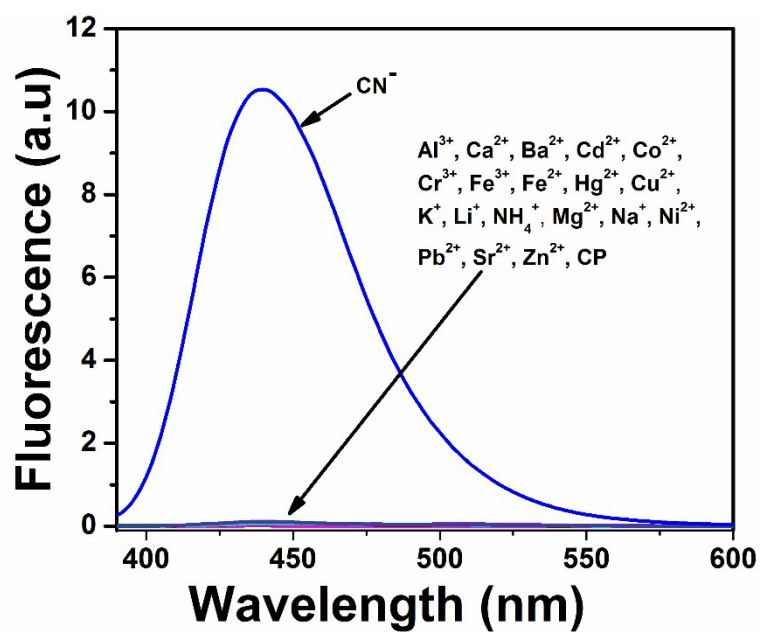

**Fig. S12.** Fluorescence spectra of mechanosynthesized CP (20  $\mu\text{M}$ , 2.5 % DMSO in water) in HEPES (50 mM aqueous buffer) upon addition of different metal ions.  $\lambda_{\text{exi}} = 370 \text{ nm}$  and  $\lambda_{\text{emi}} = 444 \text{ nm}$ .

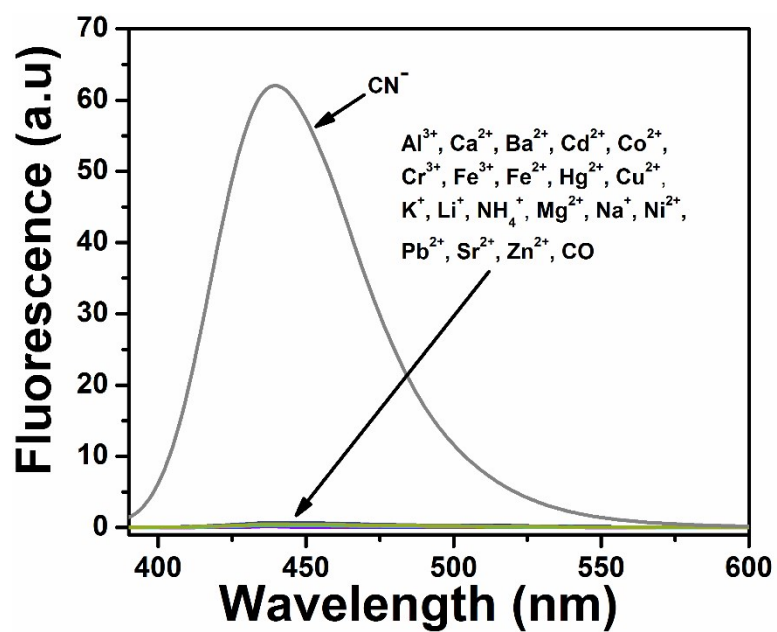

**Fig. S13.** Fluorescence spectra of mechanosynthesized CO (20  $\mu\text{M}$ , 2.5 % DMSO in water) in HEPES (50 mM aqueous buffer) upon addition of different metal ions.  $\lambda_{\text{exi}} = 370 \text{ nm}$  and  $\lambda_{\text{emi}} = 444 \text{ nm}$ .

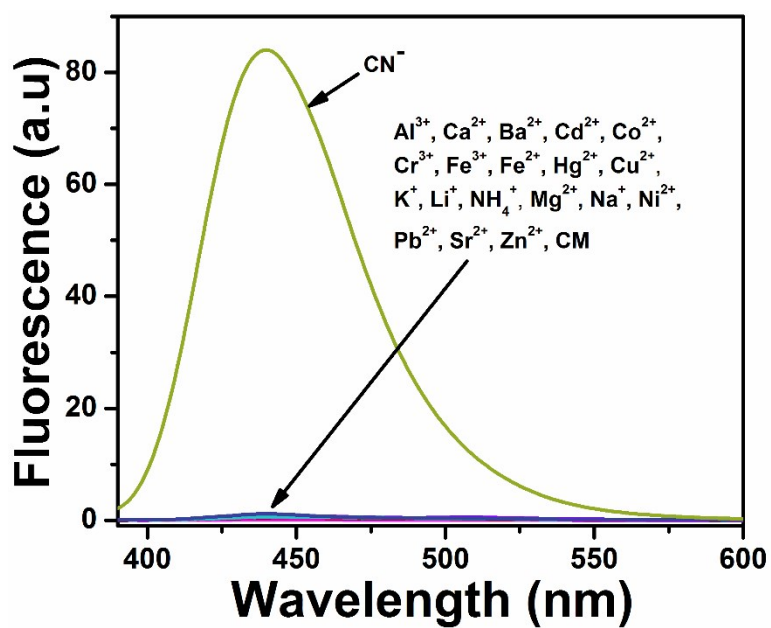

**Fig. S14.** Fluorescence spectra of mechanosynthesized CM (20  $\mu$ M, 2.5 % DMSO in water) in HEPES (50 mM aqueous buffer) upon addition of different metal ions.  $\lambda_{\text{exi}} = 370$  nm and  $\lambda_{\text{emi}} = 444$  nm.

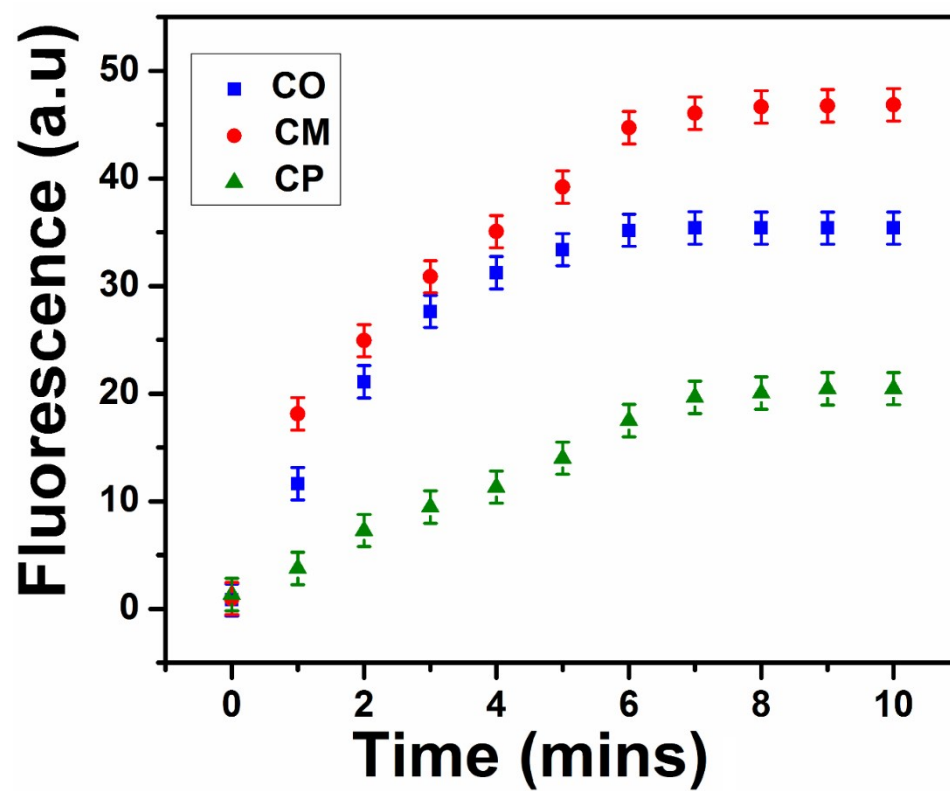

**Fig. S15.** Time dependent emission changes in the fluorescence profiles of CO, CM, and CP (20  $\mu$ M, 2.5 % DMSO in water) in HEPES (50 mM aqueous buffer) on addition of cyanide.

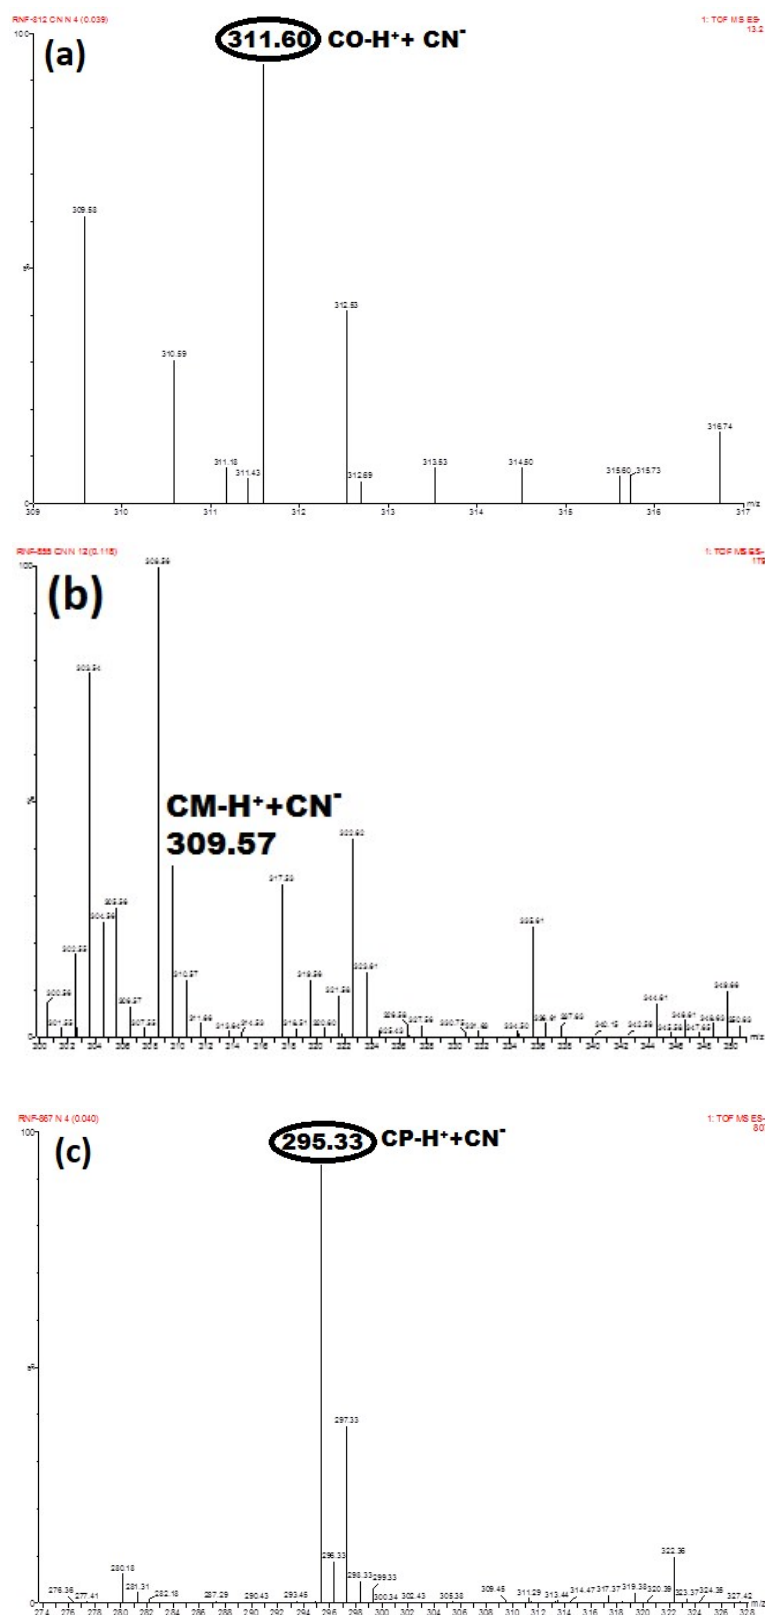

**Fig. S16.** Mass spectra of (a) CO, (b) CM, and (c) CP in presence of cyanide.



| Parameters                                                                     | CP                                                            | CM                                                            |
|--------------------------------------------------------------------------------|---------------------------------------------------------------|---------------------------------------------------------------|
| Composition                                                                    | C <sub>14</sub> H <sub>11</sub> N <sub>3</sub> O <sub>3</sub> | C <sub>32</sub> H <sub>34</sub> N <sub>6</sub> O <sub>8</sub> |
| Formula wt.                                                                    | 269.26                                                        | 630.65                                                        |
| Crystal System                                                                 | Monoclinic                                                    | Triclinic                                                     |
| Space Group                                                                    | P2 <sub>1</sub> /n                                            | P-1                                                           |
| Crystal Color                                                                  | Intense Yellow                                                | Yellow                                                        |
| a (Å )                                                                         | 7.5911(11)                                                    | 7.513(3)                                                      |
| b(Å )                                                                          | 9.7485(15)                                                    | 15.043(6)                                                     |
| c(Å )                                                                          | 16.594(3)                                                     | 16.048(6)                                                     |
| α(°)                                                                           | 90                                                            | 66.018(6)                                                     |
| β(°)                                                                           | 98.556(6)                                                     | 76.843(6)                                                     |
| γ (°)                                                                          | 90                                                            | 85.708(7)                                                     |
| V(Å <sup>3</sup> )                                                             | 1214.3(3)                                                     | 1613.3(11)                                                    |
| Density (Mg/m <sup>3</sup> ) / Z                                               | 1.473/4                                                       | 1.298/2                                                       |
| 2 θ <sub>max</sub> [deg]                                                       | 56.88                                                         | 56.58                                                         |
| Temp (K)                                                                       | 150(2)                                                        | 150(2)                                                        |
| μ mm <sup>-1</sup>                                                             | 0.107                                                         | 0.095                                                         |
| Reflections collected/unique                                                   | 3041/2626                                                     | 5000/3223                                                     |
| R(int)                                                                         | 0.0388                                                        | 0.0584                                                        |
| Data/restraints/parameters                                                     | 3041/0/225                                                    | 5000/0/425                                                    |
| R1(F <sub>0</sub> ), wR2(F <sub>0</sub> ) (I ≥ 2 σ(I))                         | 0.0419,0.1287                                                 | 0.1178,0.3305                                                 |
| R1(F <sub>0</sub> <sup>2</sup> ), wR2(F <sub>0</sub> <sup>2</sup> ) (all data) | 0.0492/0.1219                                                 | 0.1472,0.3468                                                 |
| F(000)/GOF on F <sup>2</sup>                                                   | 560/1.050                                                     | 664/1.243                                                     |
| CCDC No.                                                                       | 1911311                                                       | 1855812                                                       |

**Table S1.** X-ray crystallographic data of CP and CM.
